# Supplementary material for: Temporal Associations of Alcohol and Tobacco Consumption With Cancer Mortality
Source: PubMed Central journal article supplement (PMC6324312; doi:10.1001/jamanetworkopen.2018.0713), 2018-07-13
Supplement: jamanetwopen-1-e180713-s001.pdf [file jamanetwopen-1-e180713-s001.pdf]

## Supplementary Online Content

Jiang H, Livingston M, Room R, Chenhall R, English DR. Temporal associations of alcohol and tobacco consumption with cancer mortality. *JAMA Netw Open*. 2018;1(3):e180713. doi:10.1001/jamanetworkopen.2018.0713

### **eAppendix.** Statistical Model Development and Analysis

**eFigure 1.** Geometric Distribution of Lag Effects of Alcohol or Tobacco Consumption on Cancer Mortality in the Past 15 and 20 Years

**eFigure 2.** Skog's Lag Distribution of Lag Effects of Alcohol or Tobacco Consumption on Cancer Mortality in the Past 15 and 20 Years

**eFigure 3.** Trends in Alcohol Consumption and Lagged Alcohol Consumption Series and Overall Cancer Mortality Rate per 100 000 Population

**eFigure 4.** Trends in Tobacco Consumption and Lag Weighted Tobacco Consumption and Overall Cancer Mortality Rate per 100 000 Population

**eTable 1.** Unit Root Test for Stationarity of Time Series

**eTable 2.** Estimates of 15 Years Geometric and Skog's Lagged Effects of Alcohol and Tobacco Consumption, and Overall Cancer Mortality

**eTable 3.** Temporal Associations Between Alcohol and Tobacco Consumption and Gender- and Age-Specific Cancer Mortality Based on the Cross-Correlation Lag Model

### **eReferences**

This supplementary material has been provided by the authors to give readers additional information about their work.

## eAppendix. Statistical Model Development and Analysis

### Data collection

A proxy for per-capita alcohol consumption was constructed, using data on alcohol sales sourced from the Australian Bureau of Statistics (ABS). Data on alcohol consumption per person aged 15+ for the years 1961 to 2014 are taken from a recent synthesis of historical data,<sup>1</sup> while data from earlier years (1935-1960) were extracted manually from the relevant yearbooks<sup>2</sup> [e.g. Commonwealth Bureau of Census and Statistics report], and converted from gallons or proof gallons to litres of pure alcohol. This was then converted to litres of pure alcohol per resident aged 15 and older, using population data provided by the Australian Institute of Health and Welfare (AIHW).<sup>3</sup> Data on per capita tobacco consumption (aged 15+) from 1935 to 2014 were collected from Cancer Council Victoria<sup>4</sup> and KPMG's report, *Illicit Tobacco in Australia*.<sup>5</sup>

### Time series model

The autoregressive integrated moving average (ARIMA) modelling technique was employed to estimate the association between per-capita alcohol consumption and overall cancer mortality. ARIMA models require stationary time series to reduce the risk of obtaining a spurious relation between two series that have common trends.<sup>6</sup> The Augmented Dickey-Fuller (ADF) unit root test is commonly used for testing for stationarity.<sup>7</sup> Furthermore, the error term (which includes explanatory variables not considered in the model) is allowed to have a temporal structure that is modelled and estimated in terms of autoregressive or moving average parameters.<sup>8</sup> In most cases, a differencing of the time series is sufficient to eliminate non-stationarity.<sup>9</sup> In this study, a semi-log ARIMA model was selected (because the slope coefficient measures the relative change in dependent variable for a given absolute change in the value of the explanatory variable at time  $t$ ), as the risk for chronic diseases is a convex function of alcohol or/and tobacco intake.<sup>10</sup> The final model can be written as follows:

$$\Delta \text{LogCM}_t = \alpha + \beta \Delta \text{WALC}_t + \gamma \Delta \text{WTOB}_t + \mu \Delta C_{i,t} + \Delta E_t$$

where  $\Delta$  is the differencing operator,  $\text{LogCM}_t$  is the natural logarithm of mortality rates of overall cancer diseases in Australia per 100,000 inhabitants,  $\text{WALC}_t$  is lag weighted per-capita alcohol consumption,  $\text{WTOB}_t$  is lag weighted per-capita tobacco consumption,  $C_{i,t}$  are the other control variables considered in the estimation,  $i$  is number of control variables,  $\mu$  is the coefficient values of the control variables,  $E_t$  is the error term including other causal factors, and  $\alpha$  is the constant. The coefficient values  $\beta$  or  $\gamma$  indicate the proportional change in cancer mortality rate associated with a one-litre change in weighted per-capita alcohol consumption or a 1 kg change in weighted per capita tobacco consumption  $(e^\beta - 1) \times 100$ .

The model fit was evaluated with the aid of the Box-Ljung portmanteau test of the first 10 autocorrelations,  $Q(10)$ . The model structures used are reported below, alongside the output of the models. All statistical analyses were undertaken via E-views 7.0.

## Lag length and lag weight

### Geometric lag weight

A geometrical lag scheme was used in the estimation with  $\lambda=0.7$ . This approach builds in the lagged effects of alcohol or tobacco consumption, with higher weights placed on more recent years (shown in eFigures 1).

$$\text{Geometric weight} = \frac{X_n + 0.7^2 X_{n-1} + \dots + 0.7^{n-1} X_2 + 0.7^n X_1}{1 + 0.7 + 0.7^2 + \dots + 0.7^{n-1} + 0.7^n}$$

**eFigure 1.** Geometric Distribution of Lag Effects of Alcohol or Tobacco Consumption on Cancer Mortality in the Past 15 and 20 Years

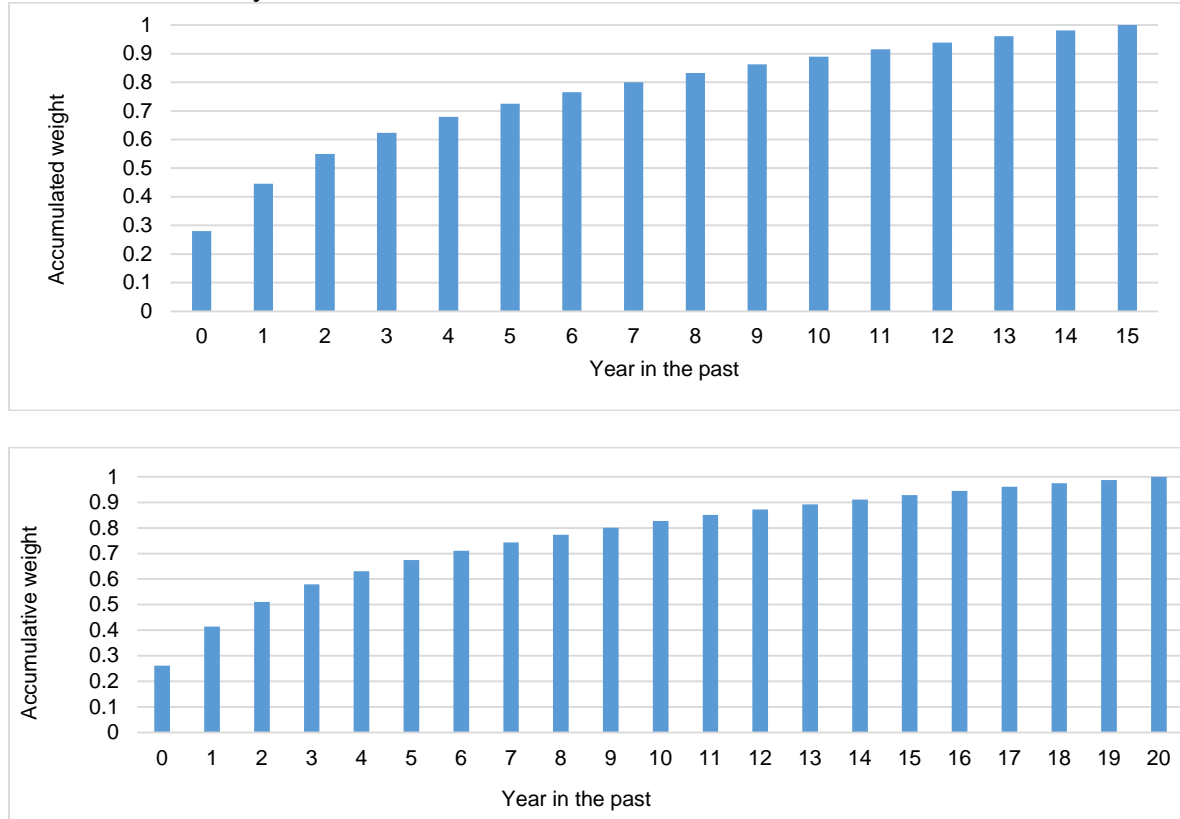

### Skog's lag weight

A three parameter lag structure developed by Skog<sup>11</sup> was also used to build lagged alcohol or tobacco consumption on cancer mortality.

$$\text{Skog lag weight} = W_t = p\theta_1^t + (1 - p)\theta_2^t$$

Where  $W_t$  is the weight of alcohol or tobacco consumption in year  $t$ ,  $\theta_1$  is the lag parameter for the short-term impact,  $\theta_2$  for long-term impact, and  $p$  determines their relative importance. Based on the previous studies on alcohol consumption and liver cirrhosis mortality,  $p = 0.80$ ,  $\theta_1 = 0.50$ ,  $\theta_2 = 0.93$  were used in our estimation (shown in eFigures 2).

**eFigure 2.** Skog’s Lag Distribution of Lag Effects of Alcohol or Tobacco Consumption on Cancer Mortality in the Past 15 and 20 Years

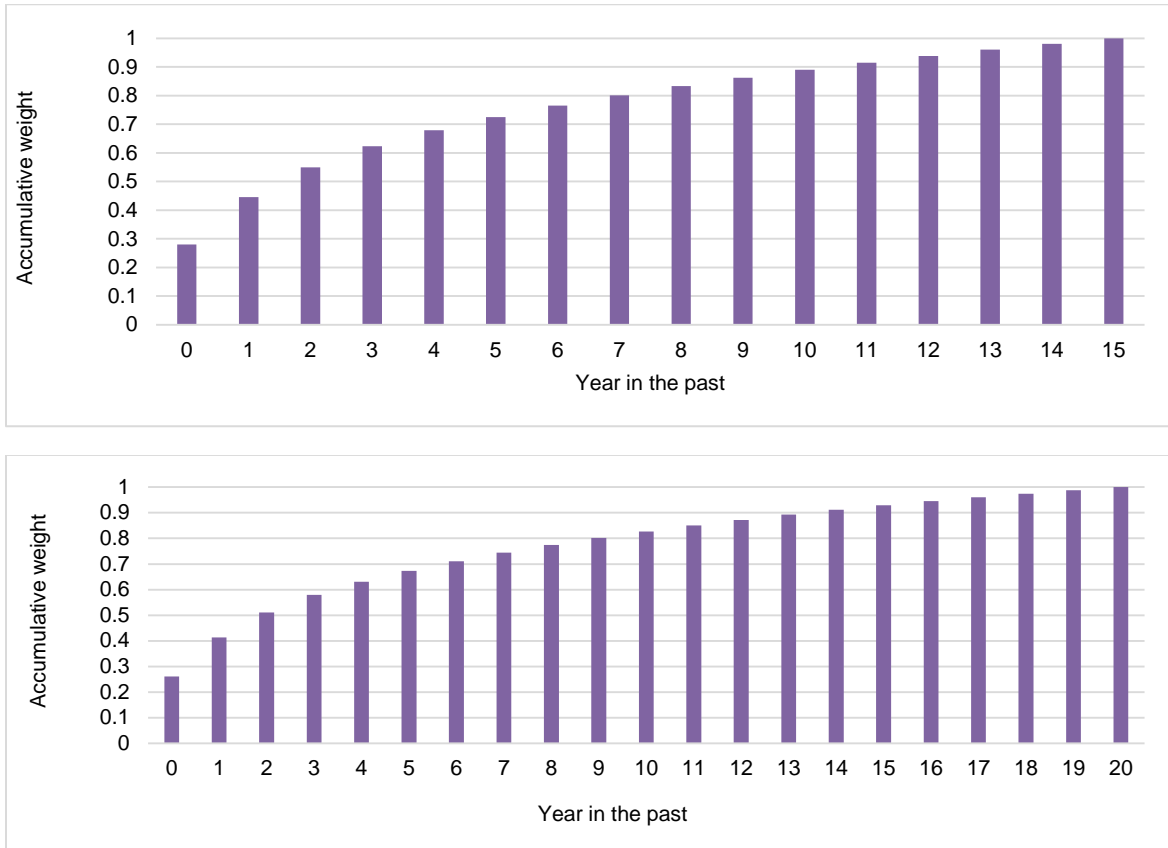

### Unit root test

The ADF unit root test (eTable 1) is employed to test the stationarity of the time series in this study, suggesting that alcohol consumption, tobacco consumption, health expenditure, and all gender- and age-specific cancer mortalities are non-stationary in data at the untransformed level, and become stationary after first differencing at the significance level of 0.05.

**eFigure 3.** Trends in Alcohol Consumption and Lagged Alcohol Consumption Series and Overall Cancer Mortality Rate per 100 000 Population

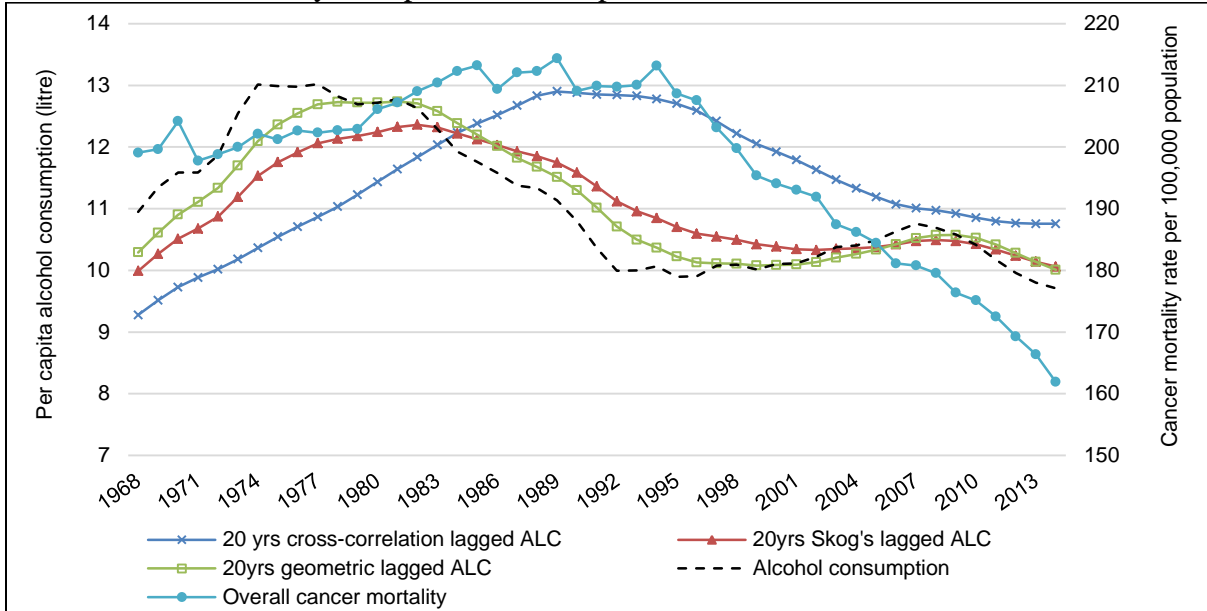

Sensitivity analysis using 15 years geometric and Skog's lagged effects of alcohol consumption

**eFigure 4.** Trends in Tobacco Consumption and Lag Weighted Tobacco Consumption and Overall Cancer Mortality Rate per 100 000 Population

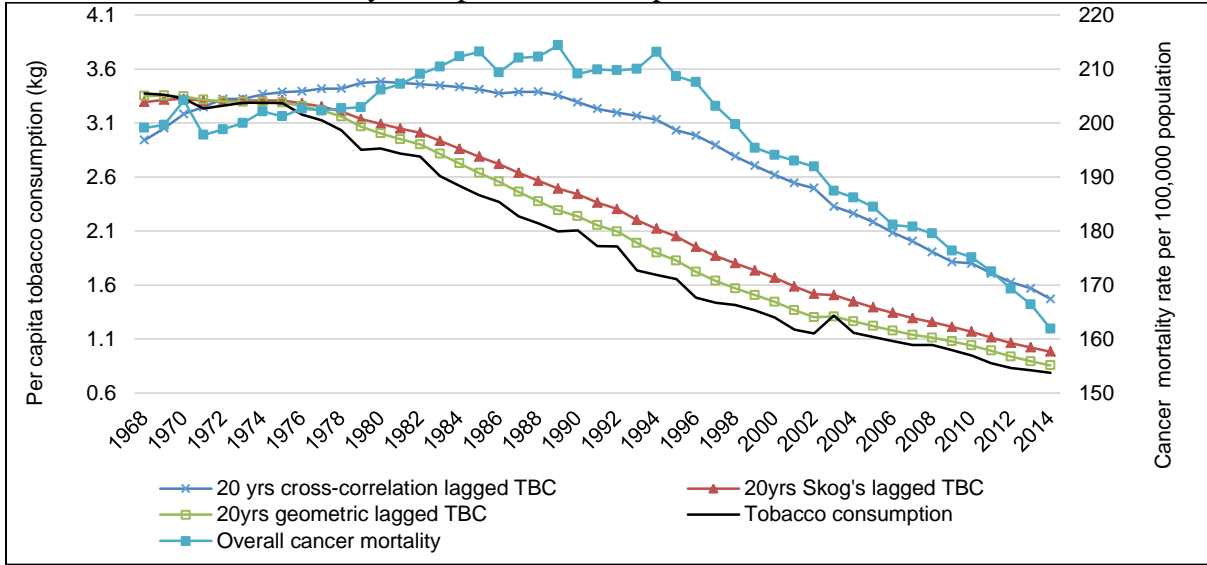

Sensitivity analysis using 15 years geometric and Skog's lagged effects of tobacco consumption

**eTable 1.** Unit Root Test for Stationarity of Time Series

|                                     | Augmented Dickey-Fuller Test on level data |         | Augmented Dickey-Fuller Test on first differenced data |         |
|-------------------------------------|--------------------------------------------|---------|--------------------------------------------------------|---------|
|                                     | T-statistics                               | P-value | T-statistics                                           | P-value |
| Alcohol consumption per capita      | -1.795                                     | 0.379   | -2.014                                                 | 0.043   |
| Tobacco consumption per capita      | -1.976                                     | 0.599   | -7.361                                                 | 0.000   |
| Health expenditure per capita       | 1.244                                      | 0.999   | -3.594                                                 | 0.040   |
| Male cancer mortality               | -0.483                                     | 0.981   | -8.799                                                 | 0.000   |
| Female cancer mortality             | -0.788                                     | 0.959   | -7.532                                                 | 0.000   |
| Overall cancer mortality            | -0.152                                     | 0.992   | -8.317                                                 | 0.000   |
| Male cancer mortality 30-49 years   | -0.576                                     | 0.866   | -9.512                                                 | 0.000   |
| Male cancer mortality 50-69 years   | -0.799                                     | 0.809   | -7.585                                                 | 0.000   |
| Male cancer mortality 70 yr+        | -0.868                                     | 0.790   | -7.032                                                 | 0.000   |
| Female cancer mortality 30-49 years | -0.339                                     | 0.911   | -10.980                                                | 0.000   |
| Female cancer mortality 50-69 years | -1.676                                     | 0.746   | -6.573                                                 | 0.000   |
| Female cancer mortality 70 yr+      | -0.553                                     | 0.977   | -10.155                                                | 0.000   |

Trends of different types of lag weighted alcohol and tobacco consumption and overall cancer mortality between 1968 and 2014



**eTable 2.** Estimates of 15 Years Geometric and Skog’s Lagged Effects of Alcohol and Tobacco Consumption, and Overall Cancer Mortality

|                                          | Male                   |                  | Female                 |                  | Total                  |                  |
|------------------------------------------|------------------------|------------------|------------------------|------------------|------------------------|------------------|
|                                          | Coef.                  | (95% CI)         | Coef.                  | (95% CI)         | Coef.                  | (95% CI)         |
| Model with 15 years geometric lag weight |                        |                  |                        |                  |                        |                  |
| Alcohol                                  | 0.027                  | (-0.014, 0.068)  | 0.000                  | (-0.039, 0.039)  | 0.013                  | (-0.018, 0.044)  |
| Tobacco                                  | -0.135                 | (-0.378, 0.108)  | -0.053                 | (-0.276, 0.170)  | -0.092                 | (-0.274, 0.090)  |
| Health spending                          | -0.175***              | (-0.269, -0.081) | -0.112*                | (-0.198, -0.026) | -0.139***              | (-0.210, -0.068) |
| Constant                                 | 0.001                  | (-0.015, 0.017)  | 0.002                  | (-0.014, 0.018)  | 0.002                  | (-0.010, 0.014)  |
| <i>Model specification</i>               | 0,1,0                  |                  | 0,1,0                  |                  | 0,1,0                  |                  |
| Box-Ljung <i>Q</i> (lag 10)              | 8.213, <i>p</i> =0.608 |                  | 7.871, <i>p</i> =0.641 |                  | 6.422, <i>p</i> =0.779 |                  |
| <i>R-square</i>                          | 0.313                  |                  | 0.150                  |                  | 0.313                  |                  |
| Model with 15 year Skog lag weight       |                        |                  |                        |                  |                        |                  |
| Alcohol                                  | 0.050*                 | (-0.001, 0.101)  | 0.014                  | (-0.033, 0.061)  | 0.031                  | (-0.006, 0.068)  |
| Tobacco                                  | -0.213                 | (-0.460, 0.034)  | -0.105                 | (-0.105, -0.338) | -0.154                 | (-0.340, 0.032)  |
| Health spending                          | -0.154**               | (-0.250, -0.058) | -0.101*                | (-0.101, -0.191) | -0.124                 | (-0.197, -0.051) |
| Constant                                 | -0.005                 | (-0.023, 0.013)  | -0.002                 | (-0.002, -0.018) | -0.003                 | (-0.017, 0.011)  |
| <i>Model specification</i>               | 0,1,0                  |                  | 0,1,0                  |                  | 0,1,0                  |                  |
| Box-Ljung <i>Q</i> (lag 10)              | 9.818, <i>p</i> =0.457 |                  | 7.307, <i>p</i> =0.696 |                  | 6.714, <i>p</i> =0.752 |                  |
| <i>R-square</i>                          | 0.353                  |                  | 0.156                  |                  | 0.345                  |                  |

Note: \*\*\**p*<0.001, \*\**p*<0.01, \**p*<0.05; S.E. is standard errors.

**eTable 3.** Temporal Associations Between Alcohol and Tobacco Consumption and Gender- and Age-Specific Cancer Mortality Based on the Cross-Correlation Lag Model

|                                                    | Male cancer       |                  | Female cancer    |                 |
|----------------------------------------------------|-------------------|------------------|------------------|-----------------|
|                                                    | Coef.             | (95% CI)         | Coef.            | (95% CI)        |
| 30-49 years                                        |                   |                  |                  |                 |
| Alcohol                                            | 0.032             | (-0.137, 0.201)  | 0.022            | (-0.051, 0.095) |
| Tobacco                                            | 0.137             | (-1.80, 1.354)   | 0.070            | (-0.181, 0.321) |
| Health expenditure (5 years geometric lag)         | -0.051            | (-0.435, 0.333)  | -0.104           | (-0.339, 0.131) |
| Constant                                           | -0.006            | (-0.039, 0.027)  | -0.014           | (-0.034, 0.006) |
| <i>Model specification</i>                         | 1,1,0             |                  | 1,1,0            |                 |
| Box-Ljung $Q$ (lag 10)                             | 6.404, $p=0.699$  |                  | 5.080, $p=0.749$ |                 |
| <i>R-square</i>                                    | 0.120             |                  | 0.451            |                 |
| 50-69 years                                        |                   |                  |                  |                 |
| Alcohol                                            | 0.095***          | (0.040, 0.150)   | 0.059**          | (0.028, 0.090)  |
| Tobacco                                            | 0.170*            | (-0.030, 0.370)  | 0.063            | (-0.151, 0.277) |
| Health expenditure (5 years Skog lag)              | -0.149*           | (-0.269, -0.029) | -0.105           | (-0.346, 0.136) |
| Constant                                           | -0.016            | (-0.026, -0.006) | -0.016           | (-0.037, 0.004) |
| <i>Model specification</i>                         | 1,1,0             |                  | 0,1,0            |                 |
| Box-Ljung $Q$ (lag 10)                             | 10.883, $p=0.284$ |                  | 8.576, $p=0.573$ |                 |
| <i>R-square</i>                                    | 0.637             |                  | 0.477            |                 |
| 70+ years                                          |                   |                  |                  |                 |
| Alcohol                                            | 0.016             | (-0.035, 0.067)  | 0.042*           | (0.020, 0.064)  |
| Tobacco                                            | 0.263**           | (0.0075, 0.451)  | 0.067            | (-0.015, 0.149) |
| Health expenditure (5 years cross-correlation lag) | -0.174*           | (-0.525, 0.177)  | 0.118*           | (0.028, 0.208)  |
| Constant                                           | 0.023             | (-0.004, 0.050)  | 0.010            | (-0.045, 0.065) |
| <i>Model specification</i>                         | 0,1,0             |                  | 0,1,1            |                 |
| Box-Ljung $Q$ (lag 10)                             | 8.350, $p=0.595$  |                  | 7.357, $p=0.600$ |                 |
| <i>R-square</i>                                    | 0.534             |                  | 0.468            |                 |

Note: \*\*\* $p<0.001$ , \*\* $p<0.01$ , \* $p<0.05$ ; S.E. is standard errors.

## eReferences

1. ABS, Apparent Consumption of Alcohol, Australia, 2013-14 (Cat: 4307.0.55.001). 2015, Australian Bureau of Statistics: Canberra.
2. Commonwealth Bureau of Census and Statistics, Official Yearbook of the Commonwealth of Australia 1911-1959. 1960, Commonwealth Bureau of Census and Statistics,: Canberra.
3. AIHW, Australian Cancer Incidence and Mortality (ACIM) books. 2016, Australian Institute of Health and Welfare: Canberra.
4. Scollo, M. and M. Winstanley, Tobacco in Australia: Facts and issues, C.C. Victoria, Editor. 2015, Cancer Council Victoria: Melbourne.
5. KPMG, Illicit tobacco in Australia 2016, London, DOI: <https://home.kpmg.com/content/dam/kpmg/pdf/2016/04/australia-illicit-tobacco-2015.pdf>.
6. Ramstedt, M., Per capita alcohol consumption and liver cirrhosis mortality in 14 European countries. *Addiction*, 2001. 96: S19-S33.
7. Dickey, D.A. and W.A. Fuller, Distribution of the estimators for autoregressive time series with a unit root. *Journal of the American Statistical Association*, 1979. 74(366): 427-431.
8. Stickley, A., T. Jukkala, and T. Norstrom, Alcohol and suicide in Russia, 1870-1894 and 1956-2005: evidence for the continuation of a harmful drinking culture across time?(Report). *Journal of Studies on Alcohol and Drugs*, 2011. 72(2): 341(7).
9. Norström, T., Per capita alcohol consumption and all-cause mortality in 14 European countries. *Addiction*, 2001. 96(1s1): 113-128.
10. Norström, T. and M. Ramstedt, Mortality and population drinking: a review of the literature. *Drug and Alcohol Review*, 2005. 24(6): 537 - 547.
11. Skog, O.J., The risk function for liver cirrhosis from lifetime alcohol consumption. *Journal of Studies on Alcohol*, 1984. 45(3): 199-208.
